# Supplementary material
Source: Royal Society of Chemistry journal article supplement (doi:10.1039/d6cc02055k)
Supplement: d6cc02055k1.pdf [file d6cc02055k1.pdf]

## Supporting Information

### **Over-Etching Constructing V<sub>2</sub>O<sub>3</sub>-VC/C Directly from MAX Phase for Lithium-Sulfur Batteries**

Mengjie Zhang,<sup>‡</sup> Maoqiang Shen,<sup>‡</sup> Yang Liu\*, Hong Xiao\*, Rui Wan, Linrui Hou,  
Changzhou Yuan\*

School of Materials Science & Engineering, University of Jinan, Jinan, 250022, P. R.  
China.

E-mail: mse\_yuancz@ujn.edu.cn; ayuancz@163.com

<sup>‡</sup> These authors have contributed equally to this work.

## 1. Experimental section

### 1.1. Chemicals and Materials

$V_2AlC$  MAX was purchased from Yiyi Technology. S powder, 1-methyl-2-pyrrolidone (NMP), and ketjen black (KB) were purchased from Sinopharm Chemical Reagent Co., LTD. 1, 2-dimethoxyethane (DME), 1, 3-dimethoxyethane (DOL),  $Li_2S$ , and conventional electrolyte LS-009 (DOL/DME solution (1 : 1, volume ratio) containing 1 M LiTFSI and 2%  $LiNO_3$ ) were purchased from DoDoChem. Carbon black and polyvinylidene fluoride (PVDF) were purchased from Guangdong Kangde New Energy Technology Co., LTD. All the chemical reagents here are used directly and have not been purified.

### 1.2. Material synthesis

*Synthesis of  $V_2O_3$ -VC/C nanosheets:* 1 g of PVDF was placed at the front of the corundum boat, while 0.2 g of  $V_2AlC$  MAX was evenly distributed at the rear. It was then placed in a corundum tube, heated at a rate of  $5\text{ }^\circ\text{C min}^{-1}$  to  $700\text{ }^\circ\text{C}$  and maintained for 0.5 h under the Ar atmosphere. After natural cooling to room temperature, the product  $V_2AlC$ -PVDF-700 at the rear of the corundum boat was collected. Subsequently, 0.2 g of  $V_2AlC$ -PVDF-700 was fully dispersed into 40 mL of 1 M NaOH solution, sealed within a polytetrafluoroethylene reactor, and reacted at  $120\text{ }^\circ\text{C}$  for 2 h to remove  $AlF_3$ . Finally, the  $V_2O_3$ -VC/C-700 nanosheets were obtained by washing and filtering with deionized water, and then drying at  $60\text{ }^\circ\text{C}$  for 12 h. With all other conditions unchanged, the etching temperature was adjusted to  $800\text{ }^\circ\text{C}$  to obtain  $V_2O_3$ -VC/C-800 nanosheets.

*Preparation of  $V_2C$  MXene:* 1 g of PVDF was placed at the front of the corundum boat, and 0.2 g of  $V_2AlC$  MAX was evenly distributed at the rear of the same corundum boat. Then, it was sealed in an Ar protected corundum tube, and heated at a rate of  $5\text{ }^\circ\text{C}$

min<sup>-1</sup> to 600 °C and maintained for 0.5 h, collect the product V<sub>2</sub>AlC-PVDF-6 from the rear. Subsequently, 0.2 g of V<sub>2</sub>AlC-PVDF-600 was dispersed into 40 mL of 1 M NaOH solution, sealed in a polytetrafluoroethylene reactor, and heat to 120 °C for 2 h to remove AlF<sub>3</sub>. After washing and filtration, the V<sub>2</sub>C MXene was obtained by vacuum drying at 60 °C for 12 h.

*Fabrication of the Modified Separators:* The synthesized V<sub>2</sub>O<sub>3</sub>-VC/C-700, V<sub>2</sub>O<sub>3</sub>-VC/C-800 or V<sub>2</sub>C were mixed, respectively, with conductive carbon black and PVDF in NMP to form a slurry with a ratio of 7 : 2 : 1. The uniformly slurry was coated onto the surface of the Celgard 2500 polypropylene (PP) separator, and then vacuum dried at 60 °C for 12 h to evaporate the NMP solvent.

*Preparation of S Cathodes:* KB/S composite was prepared by the melt-diffusion method. Typically, a uniform mixture of KB and sulfur (mass ratio of 1 : 3) is transferred into an autoclave lined with polytetrafluoroethylene under an Ar atmosphere. Subsequently, it was heated at 155 °C for 12 h to obtain the KB/S composite. Finally, the KB/S composite, PVDF, and carbon black were mixed homogeneously in the mass ratio of 8 : 1 : 1, and dispersed in NMP to form a slurry. The homogeneous slurry was coated on the Al foil and dried under vacuum at 60 °C for 12 h, then cut into discs with a diameter of 12 mm to get S cathodes. For each cathode, the sulfur loading was controlled in the range of 0.9 – 1.2 mg cm<sup>-2</sup>. According to the same method, high-loading cathodes with sulfur loading of 3.4 mg cm<sup>-2</sup> were obtained by using carbon paper as the current collector.

*LiPSs Permeation Test:* Li<sub>2</sub>S<sub>6</sub> solution (5 mM) was prepared by dispersing sulfur and Li<sub>2</sub>S with a molar ratio of 5 : 1 in a mixed solvent of DME and DOL (1 : 1, volume ratio) under stirring at 60 °C for 12 h. Normally, H-type electrolytic cells were used for the Li<sub>2</sub>S<sub>6</sub> permeation test. The modified separator was cut into discs with a diameter of

18 mm and fixed in the middle of the H-type electrolytic cells. One said of the H-type electrolytic cell was injected with  $\text{Li}_2\text{S}_6$  solution (5 mM, 20 mL), while the other said was filled with a mixture of DOL and DME (1 : 1, volume ratio, 20 mL). The color changes of  $\text{Li}_2\text{S}_6$  permeation test were observed and recorded in real time to analyze the inhibition effect for different modified materials on the shuttle effect of soluble LiPSs.

*Visualized Adsorption of  $\text{Li}_2\text{S}_6$ :* Equal mass (40 mg) of modified materials were added separately to 3 mM  $\text{Li}_2\text{S}_6$  solution (4 mL) and left to stand for 12 h, then the adsorbed supernatant was analyzed by UV spectroscopy.

*Symmetric Cell Assembly and Kinetic Evaluation of LiPSs Conversion:* 0.2 M  $\text{Li}_2\text{S}_6$  based electrolyte was prepared by dispersing sulfur and  $\text{Li}_2\text{S}$  in conventional electrolyte LS-009 at a molar ratio of 5 : 1. Electrodes for symmetric cells were prepared by dispersing the active materials in ethanol and coating them on the carbon paper. Two equivalent electrodes were used as working and counter electrodes with a loading of 1  $\text{mg cm}^{-2}$  and an electrolyte of 0.2 M  $\text{Li}_2\text{S}_6$  (25  $\mu\text{L}$ ). The cyclic voltammetry (CV) test was performed for the symmetric cells at the scan rate of  $1\text{mV s}^{-1}$  in the voltage range of -1.0 – 1.0 V.

*Nucleation and Decomposition Measurements of  $\text{Li}_2\text{S}$ :* 0.2 M  $\text{Li}_2\text{S}_8$  based electrolyte was prepared by adding S and  $\text{Li}_2\text{S}$  with a molar ratio of 7:1 in the blank electrolyte. For battery assembly, the equal masses of  $\text{V}_2\text{O}_3\text{-VC/C-800}$ ,  $\text{V}_2\text{O}_3\text{-VC/C-700}$  or  $\text{V}_2\text{C}$  coating on the carbon paper (mass loading of 1.5  $\text{mg cm}^{-2}$ ) as the cathode, and Li foil as the anode, with 25  $\mu\text{L}$  of  $\text{Li}_2\text{S}_8$  electrolyte drops on the cathode side, and 25  $\mu\text{L}$  of conventional electrolyte LS-009 drops on the anode side.

For nucleation text, the battery was discharged at a current of 0.112 mA to 2.10 V, and then discharged at a constant potential of 2.09 V until the current fell below 0.01

mA. The nucleation capacity of Li<sub>2</sub>S could be calculated by Faraday's law from the integral area of the curve.

For decomposition test, the battery was discharged to 1.80 V at 0.10 mA, and then further discharged to 1.70 V at 0.01 mA to ensure that LiPSs were fully converted to solid Li<sub>2</sub>S on the catalyst surface. After that, the battery was charged at a constant potential of 2.35 V until the current fell below 10<sup>-5</sup> A.

*Ionic conductivity calculation:* The ionic conductivity ( $\sigma$ ) and resistance ( $R_f$ ) of the commercial PP separator and modified separators were investigated using an electrochemical workstation in the AC mode, with a frequency range of 100 kHz to 0.01 Hz and an amplitude of 10 mV. The ionic conductivity of the separators was tested in SS/PP or modified-PP/SS cells and calculated using the corresponding formula<sup>1</sup>.

$$\sigma = \frac{L}{R_b \times A} \quad \text{eq.1}$$

where  $L$ ,  $A$ , and  $R_b$  were the thickness (cm) of separator, the effective area of separator (cm<sup>2</sup>) and bulk resistance ( $\Omega$ ), respectively

### 1.3. Material characterization

The micro-morphologies of V<sub>2</sub>O<sub>3</sub>-VC/C-700, V<sub>2</sub>O<sub>3</sub>-VC/C-800 and V<sub>2</sub>C were investigated by field emission scanning electron microscopy (FESEM, JEOL-6300F) and transmission electron microscopy (TEM, JEOL JEM-2100). Phase information of samples was detected by X-ray diffraction (XRD, Rigaku Ultima IV) and Raman microscope with a 532 nm laser excitation (InVia Reflex). X-ray photoelectron spectroscopy (XPS, PHI VersaProbe III) was conducted to study the chemical compositions and functional groups of the samples. The specific surface area and pore size distribution were determined *via* the Brunauer-Emmett-Teller method, with N<sub>2</sub> adsorption-desorption tests conducted at 77 K (Quantachrome, USA).

### 1.4. Electrochemical measurements

All the electrochemical measurements were tested in CR2032-type coin cells. The coin cells were assembled in an Ar-filled glovebox with KB/S electrode as cathode, Li metal as anode, and modified separator as separator. CV tests were carried out on the IVIUMSTAT workstation in the voltage window of 1.7 – 2.8 V. The galvanostatic charge/discharge plots were collected by the LAND battery-testing system (CT2001A). Electrochemical impedance spectroscopy (EIS) was performed in the frequency range of 0.01 Hz to 100 KHz.

### 1.5. Details of activation energy calculation

The CV of different modified separators was measured at a scan rate of 0.1 mV s<sup>-1</sup> at 298 K, as shown in Figure 6c. Among them, the relationship between electrode potential and activation energy is shown in eq. 2<sup>2,3</sup>:

$$E_a = E_a^0 + \alpha z F \varphi_{(\text{Red})ir} \quad \text{eq.2}$$

where  $E_a$  represented the activation energy of the reduction process,  $E_a^0$  was the intrinsic activation energy,  $\alpha$  was the symmetry factor,  $z$  was the number of transferred charges, and  $F$  is the Faraday constant. The irreversible  $\varphi_{(\text{Red})ir}$  in the reaction process is obtained through the peak potential of the redox peak on the CV curve.

The Tafel eq. 3:

$$\eta = \frac{RT}{\alpha z F} \ln j_0 - \frac{RT}{\alpha z F} \ln j \quad \text{eq.3}$$

where  $\eta$  represented the overpotential,  $R$  was the gas constant,  $T$  was the absolute temperature,  $j_0$  was the exchange current density, and  $j$  was the current density. This equation could be simplified to eq. 4:

$$\eta = a + b \ln j \quad \text{eq.4}$$

Therefore,  $a$  and  $b$  correspond respectively to the intercept eq. 5 and slope eq. 6 of

the Tafel curve:

$$a = \frac{RT}{azF} \ln j_0 \quad \text{eq.5}$$

$$b = -\frac{RT}{azF} \quad \text{eq.6}$$

Substituting the Tafel slope eq.6 into eq.2 yields a simplified eq.7:

$$E_a = E_a^0 - \frac{RT}{b} \varphi_{(Red)ir} \quad \text{eq.7}$$

The reaction activation energies during the charging and discharging process were calculated by combining the Tafel curves shown in Figure S10 with the above equations.

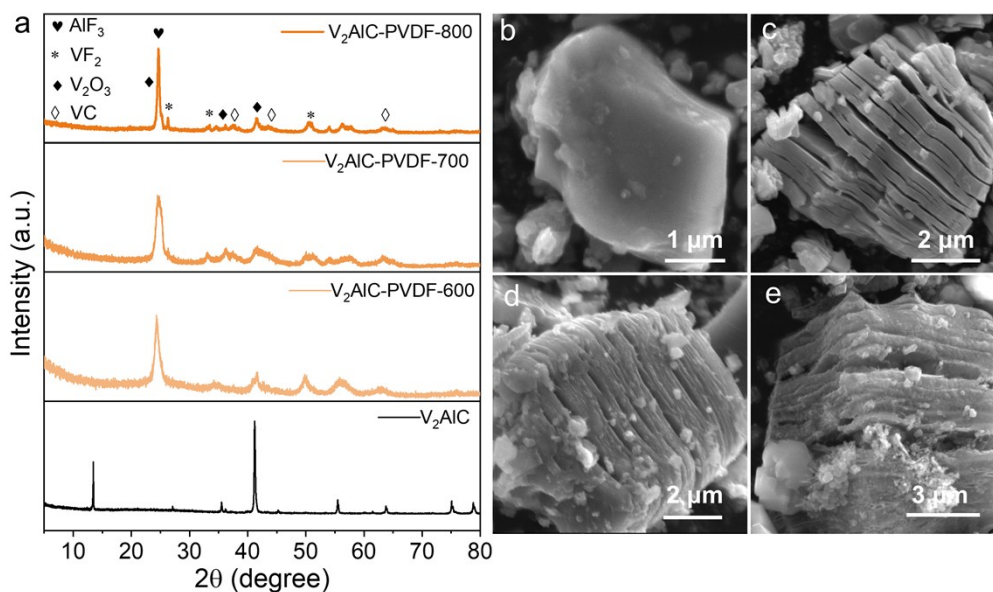

**Fig. S1** (a) XRD patterns and SEM images of (b)  $V_2AlC$ , (c)  $V_2AlC$ -PVDF-600, (d)  $V_2AlC$ -PVDF-700 and (e)  $V_2AlC$ -PVDF-800.

As shown in the XRD pattern of Figure S1a, the intensity of the (002) peak at  $13.47^\circ$  and the (103) peak at  $41.28^\circ$  of  $V_2AlC$  has significantly declined after the gas-solid phase reaction, indicating that the selectively etching of Al layer in  $V_2AlC$  by HF gas. It is worth noting that the characteristic peaks corresponding to (012), (024), and (116) crystal plane of  $AlF_3$  are observed at  $24.7^\circ$ ,  $51.8^\circ$ , and  $57.4^\circ$ , and the crystallinity of  $AlF_3$  shows a significant strengthening with the increase of etching temperature. Furthermore, the formation of  $VF_2$ , VC, and  $V_2O_3$  are observed in the patterns of both  $V_2AlC$ -PVDF-700 and  $V_2AlC$ -PVDF-800. This indicates that HF gas not only etches the Al layers but reacts with V to form  $VF_2$ , while simultaneously promoting structural transformation from  $V_2C$  to VC and inducing mild surface oxidation to generate  $V_2O_3$ . Such oxidation may be attributable to the presence of oxygen-containing functional groups within PVDF.<sup>4,5</sup>

As shown in Figure S1b,  $V_2AlC$  presents a typical dense block structure. After HF gas-solid phase etching,  $V_2AlC$ -PVDF-600 (Figure S1c),  $V_2AlC$ -PVDF-700 (Figure S1d), and  $V_2AlC$ -PVDF-800 (Figure S1e) all exhibit varying degrees of volume expansion, forming an accordion-like structure with nanoparticles adhering to the surface.

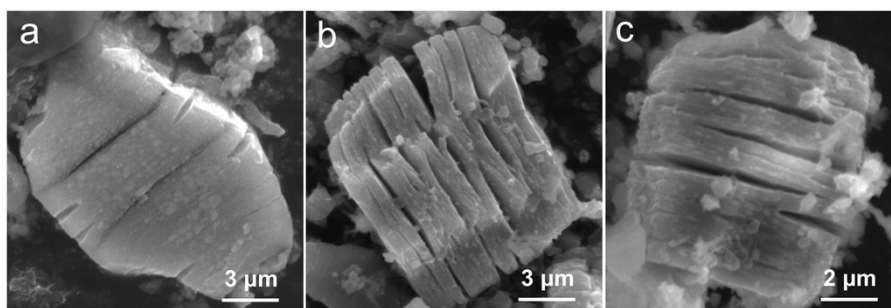

**Fig. S2** SEM images of (a)  $V_2C$ , (b)  $V_2O_3$ -VC/C-700 and (c)  $V_2O_3$ -VC/C-800.

As shown in Fig. S2a, the  $V_2C$  MXene presents a highly smooth surface after NaOH treatment, with no  $AlF_3$  observed, which demonstrates the efficient removal of fluoride by the alkali washing process. In addition, the surface nanoparticles of  $V_2O_3$ -VC/C-700 (Figure S2b) and  $V_2O_3$ -VC/C-800 (Figure S2c) decrease, showing more obvious gaps. It is worth noting that the accordion-like layered structure of MAX derivatives is not destroyed during the NaOH treatment, but rather, its layered characteristics become more prominent.

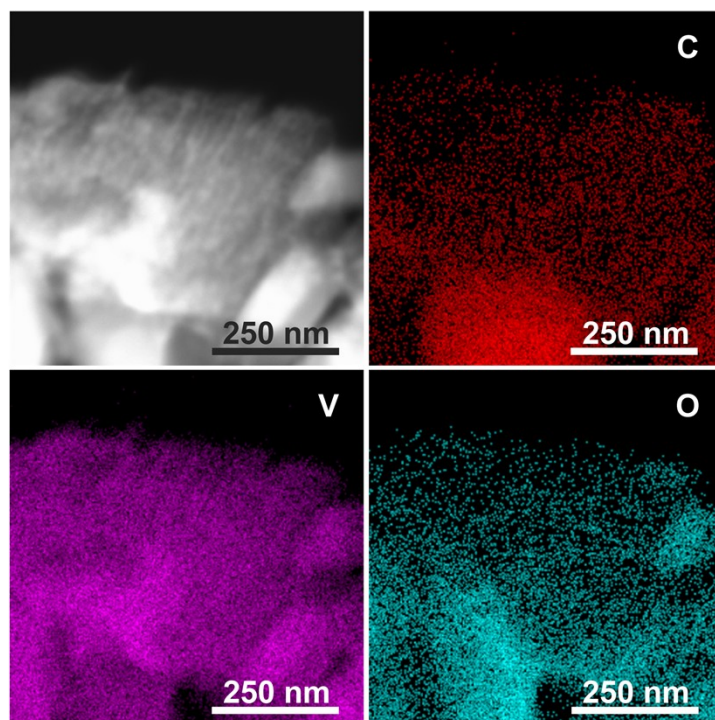

**Fig. S3** EDX elemental mapping images of C, O, and V.

The energy-dispersive X-ray spectroscopy (EDS) elemental mapping in Fig. S3 reveals the uniform distribution of C, N, O, and V in  $V_2O_3$ -VC/C-700, further confirming the coexistence of  $V_2O_3$  and VC derived from the over-etching of the MAX phase.

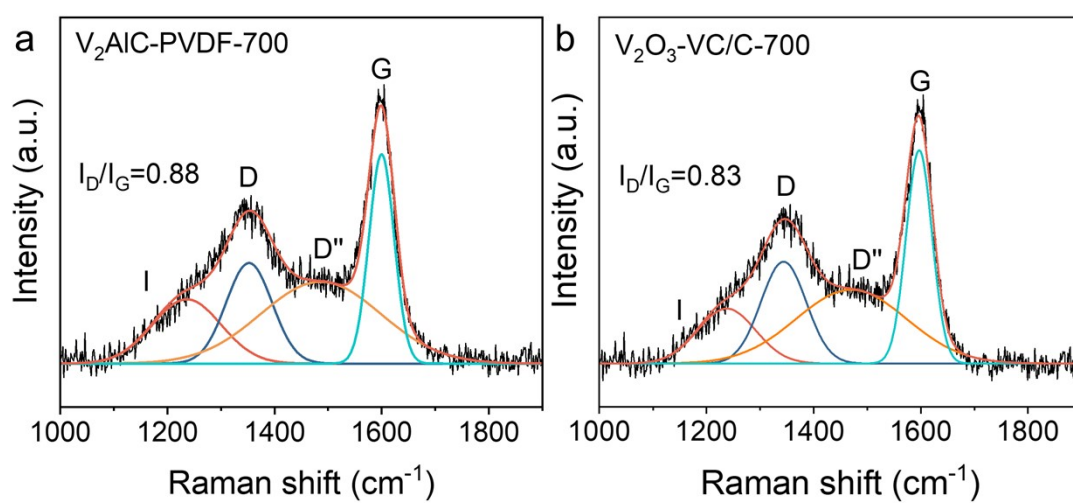

**Fig. S4** Raman and fitting diagrams of (a) V<sub>2</sub>AlC-PVDF-700 and (b) V<sub>2</sub>O<sub>3</sub>-VC/C-700.

As shown in Figure S4, two strong characteristic peaks can be observed at 1354 and 1596 cm<sup>-1</sup>, belonging to the D and G bands of carbon, and the fitted peak area ratios ( $I_D/I_G$ ) of the D and G bands are 0.88 and 0.83, respectively.

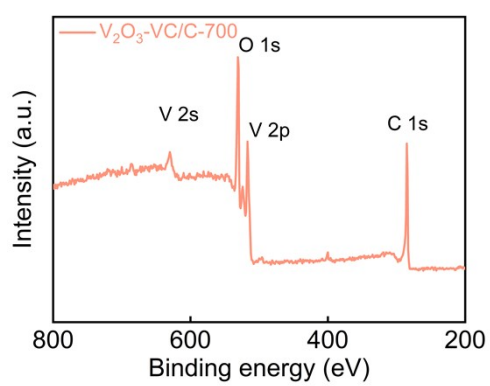

**Fig. S5** The XPS spectrum of V<sub>2</sub>O<sub>3</sub>-VC/C-700.

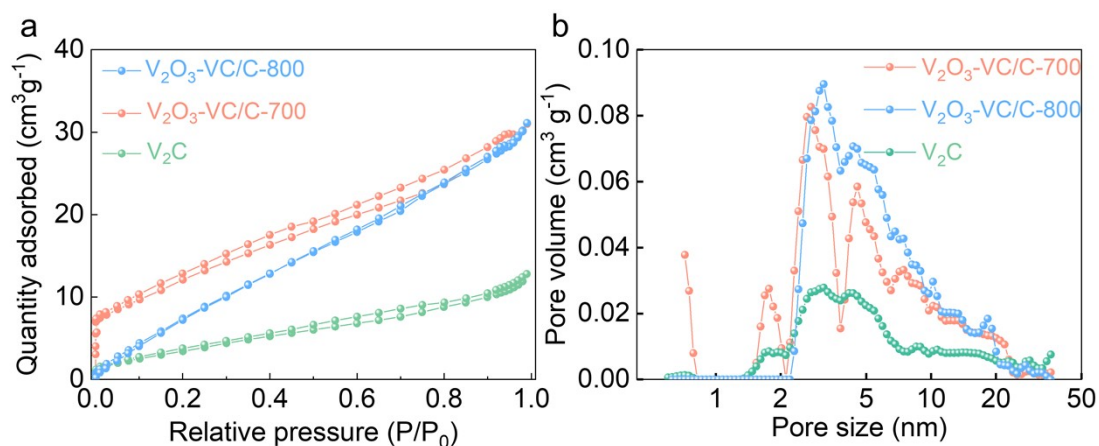

**Fig. S6** (a) N<sub>2</sub> adsorption-desorption isothermal plots and (b) pore size distribution curves of V<sub>2</sub>C, V<sub>2</sub>O<sub>3</sub>-VC/C-700 and V<sub>2</sub>O<sub>3</sub>-VC/C-800.

The specific surface area (SSA) and pore size of MAX derivatives obtained at different etching temperatures were analyzed by N<sub>2</sub> sorption experiments. V<sub>2</sub>O<sub>3</sub>-VC/C-700 possesses the largest SSA of 37.9 cm<sup>2</sup> g<sup>-1</sup>, higher than those of V<sub>2</sub>C (24.4 cm<sup>2</sup> g<sup>-1</sup>) and V<sub>2</sub>O<sub>3</sub>-VC/C-800 (33.7 cm<sup>2</sup> g<sup>-1</sup>) (Table S1). The large SSA, pore volume and rich pore structure of V<sub>2</sub>O<sub>3</sub>-VC/C-700 not only facilitate the adsorption of LiPSs, but expose more catalytic active sites, accelerating the conversion of LiPSs.

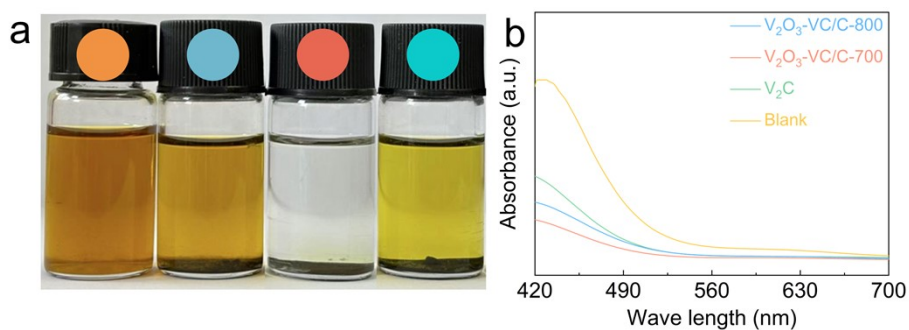

**Fig. S7** (a) Digital photos of  $V_2C$ ,  $V_2O_3$ -VC/C-700 and  $V_2O_3$ -VC/C-800 and (b) UV-vis spectra of the corresponding supernatant after  $Li_2S_6$  adsorption experiment.

The adsorption capacity of  $V_2C$ ,  $V_2O_3$ -VC/C-700 and  $V_2O_3$ -VC/C-800 for  $Li_2S_6$  was investigated by  $Li_2S_6$  adsorption experiments and UV spectra. Obviously, the color faded markedly in  $Li_2S_6$  solution containing  $V_2O_3$ -VC/C-700, which reflects that  $V_2O_3$ -VC/C-700 has a good adsorption effect on LiPSs due to the strong chemisorption. In contrast, the adsorption of LiPSs by  $V_2C$  is poor, which is further confirmed by UV-vis spectroscopy.

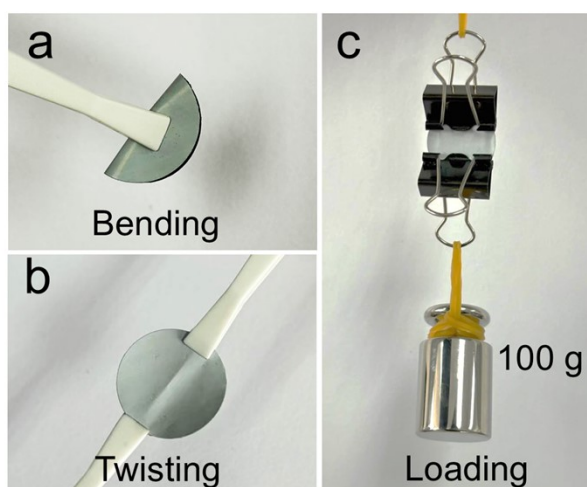

**Fig. S8** (a) bending, (b) tensile and (c) loading tests of  $V_2O_3$ -VC/C-700/PP modified separator.

The coating in the  $V_2O_3$ -VC/C-700 modified separator ( $V_2O_3$ -VC/C-700/PP) remains intact without cracking or detachment after repeated folding and stretching, exhibiting its robust adhesion (Fig. S8, ESI).

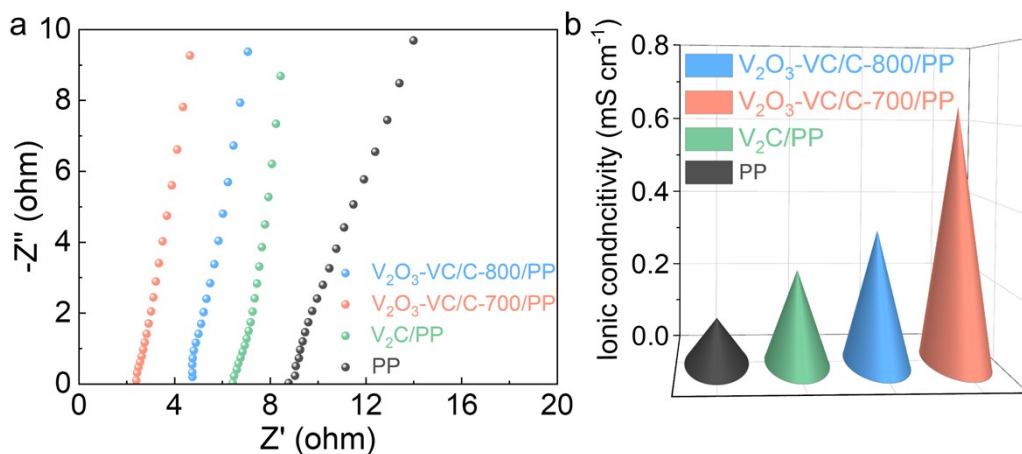

**Fig. S9** (a) EIS plots and (b)  $Li^+$  conductivities of the batteries with different separators.

Ionic conductivity is a key indicator for separator modification, which directly determines the ion transport efficiency, rate capability and safety of the battery system, and also serves as a critical quantitative basis for evaluating the effectiveness of modification strategies. The ionic conductivity of the  $V_2O_3$ -VC/C-700/PP coated separator is  $0.6424\ mS\ cm^{-1}$ , which is higher than those of  $V_2O_3$ -VC/C-800/PP ( $0.3313\ mS\ cm^{-1}$ ),  $V_2C$ /PP ( $0.232\ mS\ cm^{-1}$ ), and the commercial PP separator ( $0.112\ mS\ cm^{-1}$ ), as shown in Fig. S9. This further demonstrates that the  $V_2O_3$ -VC/C-700 coating layer endows PP with superior ion transport kinetics.

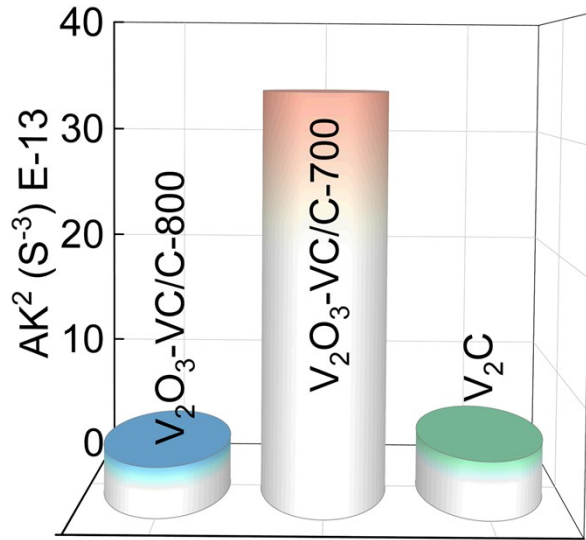

**Fig. S10** Nucleation rates of Li<sub>2</sub>S with different electrodes.

The nucleation rate constant, growth rate and peak current corresponding to the deposition time of Li<sub>2</sub>S are shown in the following equation:

$$AK^2 = \frac{1}{\pi t_m^3} \quad \text{eq 7}$$

Here, A represents the nucleation rate constant (cm<sup>-2</sup> s<sup>-1</sup>), *k* is the growth rate (cm<sup>-2</sup> s<sup>-1</sup>), and *t<sub>m</sub>* is the peak current time (s). The calculated nucleation and growth rate results of Li<sub>2</sub>S (*Ak<sup>2</sup>*) are shown in Fig. S10.

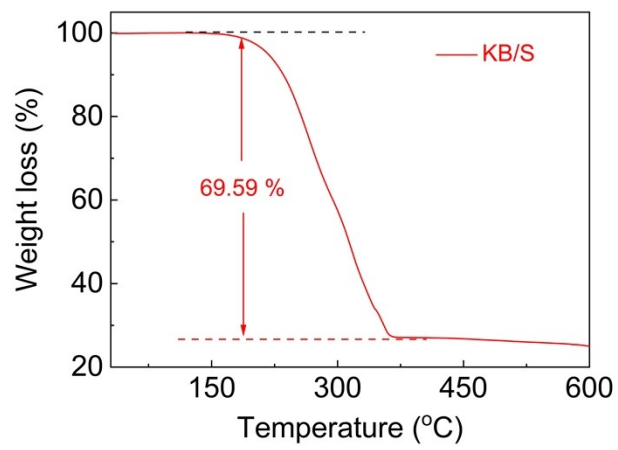

**Fig. S11** TG plot of the KB/S composite.

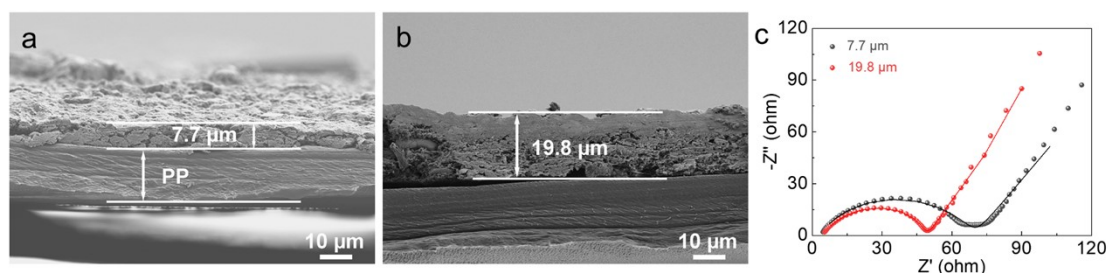

**Fig. S12** (a, b) FE-SEM images of the modified PP separators with different coating thicknesses of  $V_2O_3$ -VC/C-700. (c) EIS profiles and corresponding fitted data by using the equivalent circuit.

$V_2O_3$ -VC/C-700 modified material was employed to further investigate the effect of different coating thicknesses on the performance of LSBs (Fig. 3h, Fig. S12, and Table S3). As clearly observed from Table S3, the charge-transfer resistance ( $R_{ct}$ ) of the modified separator is significantly lower than that of the pristine PP separator, indicating that it can effectively optimize the electrode–electrolyte interface, reduce charge-transfer resistance, and accelerate the redox reaction kinetics of LiPSs, thereby improving the reaction kinetics and electrochemical stability of the battery. For the modified separators,  $R_{ct}$  shows a decreasing trend with the reduction of coating thickness. Nevertheless, the variation in  $R_{ct}$  is negligible when the coating thickness is reduced from 14.2 μm to 7.7 μm. Therefore, to achieve better ion transport and effective suppression of the shuttle effect, the modified separator with a coating thickness of 14.2 μm was used as the main research subject in this work.

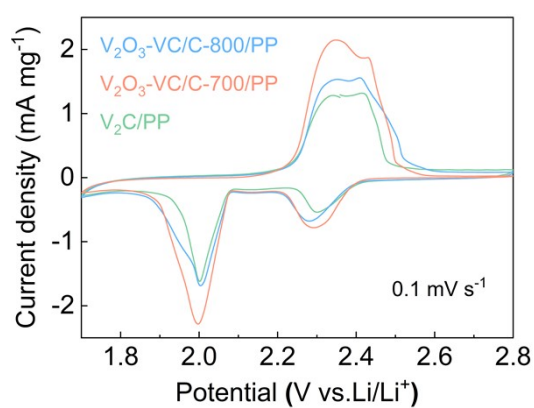

**Fig. S13** CV curves ( $0.1 \text{ mV s}^{-1}$ ) of  $\text{V}_2\text{O}_3\text{-VC/C-800/PP}$ ,  $\text{V}_2\text{O}_3\text{-VC/C-700/PP}$  and  $\text{V}_2\text{C/PP}$ .

It can be easily observed from Fig. S13 that  $\text{V}_2\text{O}_3\text{-VC/C-700/PP}$  provides a higher peak current density than other materials, indicating that its catalytic ability in the LiPS conversion process is superior. This promotes more active materials to participate in the battery reaction, thereby improving the utilization rate of sulfur.

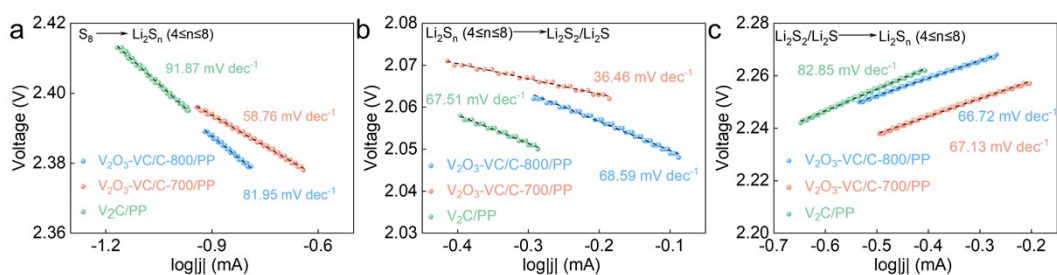

**Fig. S14** Tafel plots derived from a) Peak I, b) Peak II, and c) Peak III with different separators.

The Tafel fitting curves intuitively quantify the catalytic behaviors of different modified separators on the LiPSs bi-directional conversion in LSBs. The  $V_2O_3$ -VC/C-700/PP based cell exhibits considerably smaller Tafel slope across all three reaction stages than the  $V_2C$ /PP and  $V_2O_3$ -VC/C-800/PP based cells, reflecting its faster reaction kinetics for LiPSs conversion.

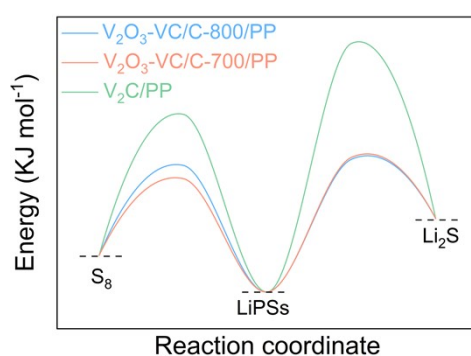

**Fig. S15** Activation energies of the reduction conversion of LiPSs.

According to the activation energies of the stepwise sulfur conversion calculated from CV and Tafel data, V<sub>2</sub>O<sub>3</sub>-VC/C-700/PP based cells illustrate the lowest activation energy for sulfur reduction reaction, further confirming the superior catalytic effect of the V<sub>2</sub>O<sub>3</sub>-VC/C-700 catalyst.

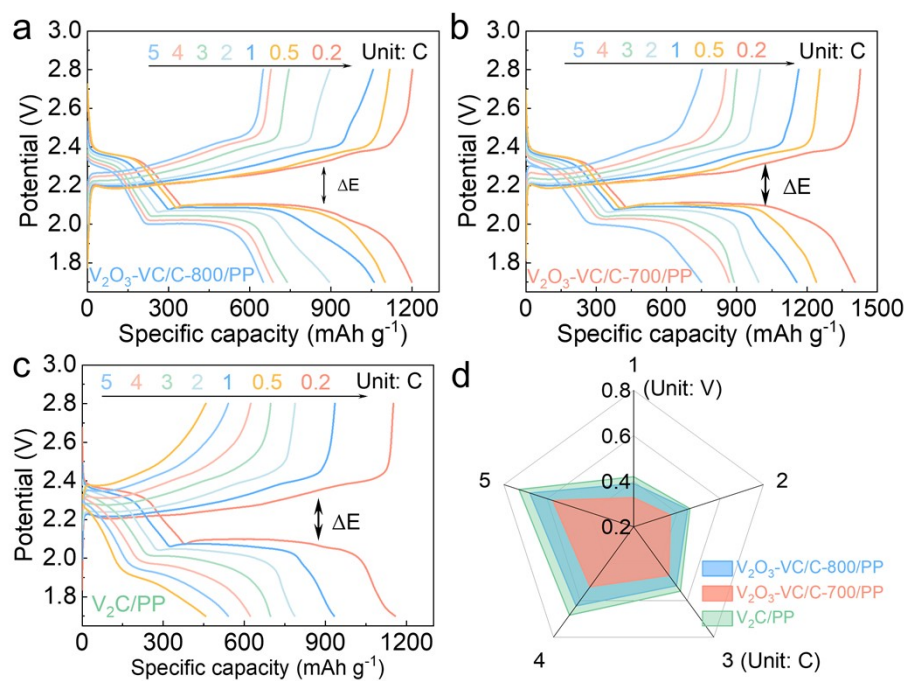

**Fig. S16** Charge-discharge curves of LSBs assembled with (a) V<sub>2</sub>O<sub>3</sub>-VC/C-800/PP, (b) V<sub>2</sub>O<sub>3</sub>-VC/C-700/PP and (c) V<sub>2</sub>C/PP at different current densities, (d) potential difference of the charge-discharge platform.

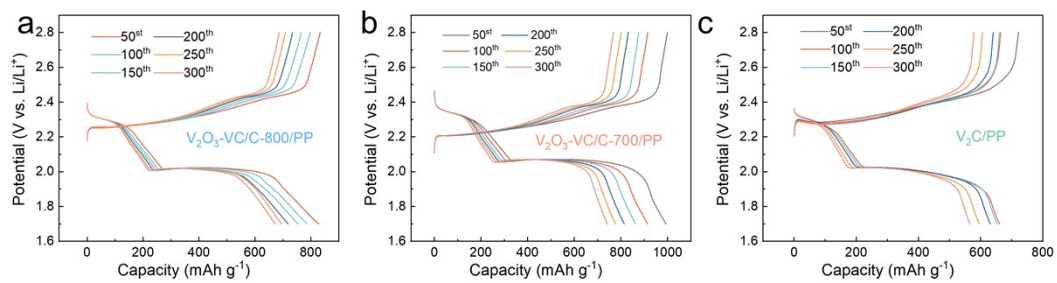

**Fig. S17** Charge-discharge curves of LSBs assembled with (a)  $V_2O_3$ -VC/C-800/PP, (b)  $V_2O_3$ -VC/C-700/PP and (c)  $V_2C$ /PP at a current density of 1 C with different cycle.

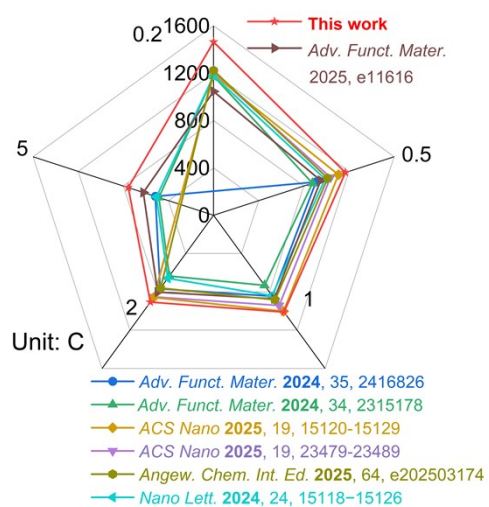

**Fig. S18** Comparison in electrochemical performance of  $V_2O_3$ -VC/C-700/PP with other recent relevant literature.<sup>6-12</sup>

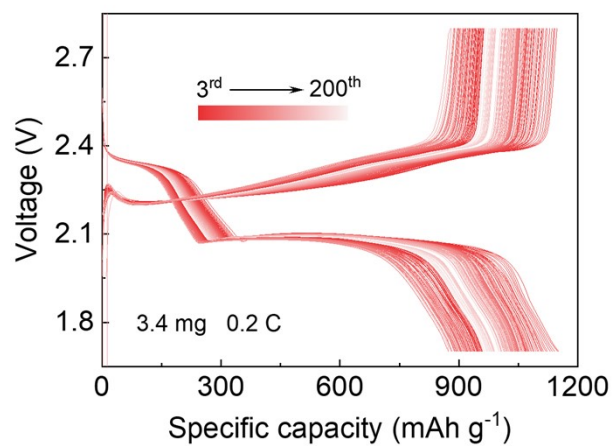

**Fig. S19** The charge-discharge plots of V<sub>2</sub>O<sub>3</sub>-VC/C-700/PP based cell at different cycles.

**Table S1** BET specific surface area and pore volume of different materials.

| Materials                               | BET (m <sup>2</sup> g <sup>-1</sup> ) | BJH (cm <sup>3</sup> g <sup>-1</sup> ) |
|-----------------------------------------|---------------------------------------|----------------------------------------|
| V <sub>2</sub> C                        | 8.722                                 | 0.017                                  |
| V <sub>2</sub> O <sub>3</sub> -VC/C-700 | 41.614                                | 0.044                                  |
| V <sub>2</sub> O <sub>3</sub> -VC/C-800 | 17.95                                 | 0.042                                  |

**Table S2** Nucleation and dissolution peak current, the corresponding time and deposition capacity of Li<sub>2</sub>S on different electrodes.

|                                 | Materials                               | Current<br>(mA) | Time<br>(s) | specific capacity<br>(mAh g <sup>-1</sup> ) |
|---------------------------------|-----------------------------------------|-----------------|-------------|---------------------------------------------|
| Li <sub>2</sub> S Nucleation    | V <sub>2</sub> O <sub>3</sub> -VC/C-700 | 0.203           | 4549        | 237.1                                       |
|                                 | V <sub>2</sub> O <sub>3</sub> -VC/C-800 | 0.085           | 8740        | 197.9                                       |
|                                 | V <sub>2</sub> C                        | 0.067           | 9175        | 72.4                                        |
| Li <sub>2</sub> S Decomposition | V <sub>2</sub> O <sub>3</sub> -VC/C-700 | 0.273           | 1354        | —                                           |
|                                 | V <sub>2</sub> O <sub>3</sub> -VC/C-800 | 0.241           | 2085        | —                                           |
|                                 | V <sub>2</sub> C                        | 0.255           | 2739        | —                                           |

**Table S3**  $R_s$  and  $R_{ct}$  for the separators with different coating thicknesses.

| Separator                                  | Thickness ( $\mu\text{m}$ ) | $R_s$ | $R_{ct}$ |
|--------------------------------------------|-----------------------------|-------|----------|
| PP                                         | 0                           | 3.34  | 86.81    |
| V <sub>2</sub> O <sub>3</sub> -VC/C-700/PP | 7.7                         | 4.81  | 45.31    |
| V <sub>2</sub> O <sub>3</sub> -VC/C-700/PP | 14.2                        | 3.56  | 47.83    |
| V <sub>2</sub> O <sub>3</sub> -VC/C-700/PP | 19.8                        | 3.44  | 63.27    |

**Table S4**  $R_s$  and  $R_{ct}$  for the different separators as indicated.

| Separator                                  | $R_s$ | $R_{ct}$ |
|--------------------------------------------|-------|----------|
| PP                                         | 3.34  | 86.81    |
| V <sub>2</sub> C/PP                        | 3.64  | 78.08    |
| V <sub>2</sub> O <sub>3</sub> -VC/C-700/PP | 3.56  | 47.83    |
| V <sub>2</sub> O <sub>3</sub> -VC/C-800/PP | 3.89  | 54.93    |

**Table S5** Performance comparison of LSBs with various separators.

| Coated Materials                              | Current rate (C) | Cycle number | Capacity decay per cycle (%) | Ref.             |
|-----------------------------------------------|------------------|--------------|------------------------------|------------------|
| <b>V<sub>2</sub>O<sub>3</sub>-VC/C-700/PP</b> | <b>5</b>         | <b>1500</b>  | <b>0.034</b>                 | <b>This work</b> |
| CoO-Co <sub>3</sub> O <sub>4</sub> /PP        | 5                | 1000         | 0.065                        | 2                |
| FeCoNiMnRu/CNF                                | 1                | 500          | 0.060                        | 13               |
| RP-BP@G/PP                                    | 1                | 500          | 0.068                        | 14               |
| W/Sn@PP                                       | 2                | 1000         | 0.060                        | 15               |
| P-MoO <sub>2-x</sub> /NPC                     | 0.5              | 1000         | 0.062                        | 16               |
| Cs <sub>2</sub> SnI <sub>6</sub>              | 2                | 500          | 0.068                        | 17               |
| V <sub>2</sub> CT <sub>x</sub> /PCNF          | 1                | 400          | 0.073                        | 18               |
| TCM-50                                        | 2                | 1000         | 0.057                        | 19               |
| MoB                                           | 4                | 600          | 0.065                        | 20               |

**Table S6** Performance comparison of LSBs under high-load and low-E/S-ratio conditions.

| Materials                                     | Sulfur loading | E/S ratio ( $\mu\text{l mg}^{-1}$ ) | Initial specific capacity (mAh $\text{g}^{-1}$ ) @ rates | Ref.             |
|-----------------------------------------------|----------------|-------------------------------------|----------------------------------------------------------|------------------|
| <b>V<sub>2</sub>O<sub>3</sub>-VC/C-700/PP</b> | <b>3.4</b>     | <b>14.7</b>                         | <b>1152.2@0.2 C</b>                                      | <b>This work</b> |
| Fe-ZIF-8                                      | 5.0            | 5.0                                 | 517@0.05 C                                               | 21               |
| Co-HTP/CG                                     | 4.1            | --                                  | 757@0.2 C                                                | 22               |
| Co@SNC                                        | 4.1            | 6                                   | 814@0.2 C                                                | 23               |
| VC-1/PP                                       | 5.3            | 7                                   | 703@0.2 C                                                | 24               |

## Reference

- 1 D. Wang, Z. Dong, H. Yan, X. Lu, C. Shi, F. Liu, L. Huang and Z. Sun, *Adv. Energy Mater.*, 2025, **15**, e04046.
- 2 M. Zhang, H. Xiao, Y. Liu, W. Hou, X. Li, J. Deng, L. Hou and C. Yuan, *Adv. Funct. Mater.*, 2026, **36**, e20708.
- 3 W. Hua, H. Li, C. Pei, J. Xia, Y. Sun, C. Zhang, W. Lv, Y. Tao, Y. Jiao, B. Zhang, S. Qiao, Y. Wan and Q. Yang, *Adv. Mater.*, 2021, **33**, 2101006.
- 4 H. Shi, C. J. Zhang, P. Lu, Y. Dong, P. Wen and Z.-S. Wu, *ACS Nano*, 2019, **13**, 14308–14318.
- 5 R. Huang, R. Lin, A. Ren, F. Zhao, C. Zhao, R. Sun, X. Yang and X. Gao, *Electrochim. Acta*, 2026, **551**, 148187.
- 6 Z. Liu, A. Chen, G. Zhang, P. Yu, D. Wang, L. Zhang, K. Tao, F. Han, W. He, Q. Jin, C. Zhang, X. Ma, X. Wang, T. Qi, Z. Li, J. Bai, L. Li, Z. Zhang, J. Dong, J. Li, X. Zhang and L. Wu, *Adv. Funct. Mater.*, 2025, **35**, e11616.
- 7 L. Sun, H. Xu, J. Xie, Y. Yuan, H. Wang, M. Wang, X. Chen and Z. Jin, *Adv. Funct. Mater.*, 2024, **35**, 2416826.
- 8 Z. Wang, H. Jiang, C. Wei, K. Tian, Y. Li, X. Zhang, S. Xiong, C. Zhang and J. Feng, *Adv. Funct. Mater.*, 2024, **34**, 2315178.
- 9 B. Wang, Z. Xing, S. Jia, Q. He, Y. Zhao, X. Meng and S. Tang, *ACS Nano*, 2025, **19**, 15120–15129.
- 10 R. Zhu, Z. Wu, C. He, S. Li, X. Liu, M. Wu, M. Wang, R. Yan and S. Li, *ACS Nano*, 2025, **19**, 23479–23489.
- 11 M. Li, H. Liu, H. Li, D. Luan, Z. Liu and X. W. (David) Lou, *Angew. Chem. Int. Ed.*, 2025, **64**, e202503174.
- 12 H. Ding, Z. Chen, H. Li, H. Suo, C. Liu, H. Yu, J. Yuan, Z. Sun, Y. Zhu and B. Song, *Nano Lett.*, 2024, **24**, 15118–15126.
- 13 B. Li, H. Wang, Y. Shen, Z. Zhang, Y. Xiong, M. Wang, W. Li, W. Zhou and J. He, *ACS Nano*, 2025, **19**, 12021–12032.
- 14 X. Dong, X. Chen, X. Tong, G. Liu, H. Yu, W. Liu, H. Li, J. Sun, X. Gu and S.

- Zhang, *Chem. Eng. J.*, 2025, **519**, 164704.
- 15 H. Lu, Y. Su, X. Zhang, Y. Ma, C. Li, S. Luo, L. Kong and Y. Yuan, *Adv. Funct. Mater.*, **35**, 2425863.
- 16 M. Shi, X. Han, W. Qu, M. Jiang, Q. Li, F. Jiang, X. Xu, S. Ifuku, C. Zhang, C. Wang, J. Hu, L. Yang, Y. Lin, H. Yu, S. Liu, J. Li, Y. Wu and W. Chen, *Adv. Mater.*, 2025, **37**, 2419918.
- 17 H. Fang, W. Hou, C. Li, S. Li, F. Chu, X. Li, X. Zhang, L. Hou, C. Yuan and Y. Ma, *Chem. Sci.*, 2025, **16**, 8487-8500.
- 18 S. Jeong, S. Kim, H. Kim, Y. Kim, H. Yu, H. S. Kim and D. Lee, *Small Struct.*, 2025, **6**, 2500277.
- 19 B. Zhao, L. Song, Z. Zou, Z. Xiong, Y. Zhang, Q. Yang, Z. Shi, Y. Zhang and Y. Song, *Adv. Funct. Mater.*, 2025, **37**, 2500079.
- 20 J. Pu, S. Fan, Z. Shen, J. Yin, Y. Tan, K. Zhang, B. Wu, G. Hong and Y. Yao, *Adv. Funct. Mater.*, 2025, **35**, 2424215.
- 21 R. Razaq, M. M. U. Din, D. R. Småbråten, V. Eyupoglu, S. Janakiram, T. O. Sunde, N. Allahgoli, D. Rettenwander and L. Deng, *Adv. Energy Mater.*, 2023, **14**, 2302897.
- 22 Q. Lv, Y. Sun, B. Li, C. Li, Q. Zhang and L. Wang, *Adv. Energy Mater.*, 2024, **15**, 2403223.
- 23 Y. Sun, Y. Wang, C. Li, Q. Zhang, L. Wang, Q. Lv and S. Feng, *Adv. Funct. Mater.*, 2025, **35**, 2421780.
- 24 L. Chen, Y. Sun, X. Wei, L. Song, G. Tao, X. Cao, D. Wang, G. Zhou and Y. Song, *Adv. Mater.*, 2023, **35**, 2300771.
